# Supplementary material
Source: Springer Nature journal article supplement (https://www.springermedizin.de/resource/supplementary/12879_2009_1031_MOESM12_ESM.pdf/9442434)

Classical Ogawa

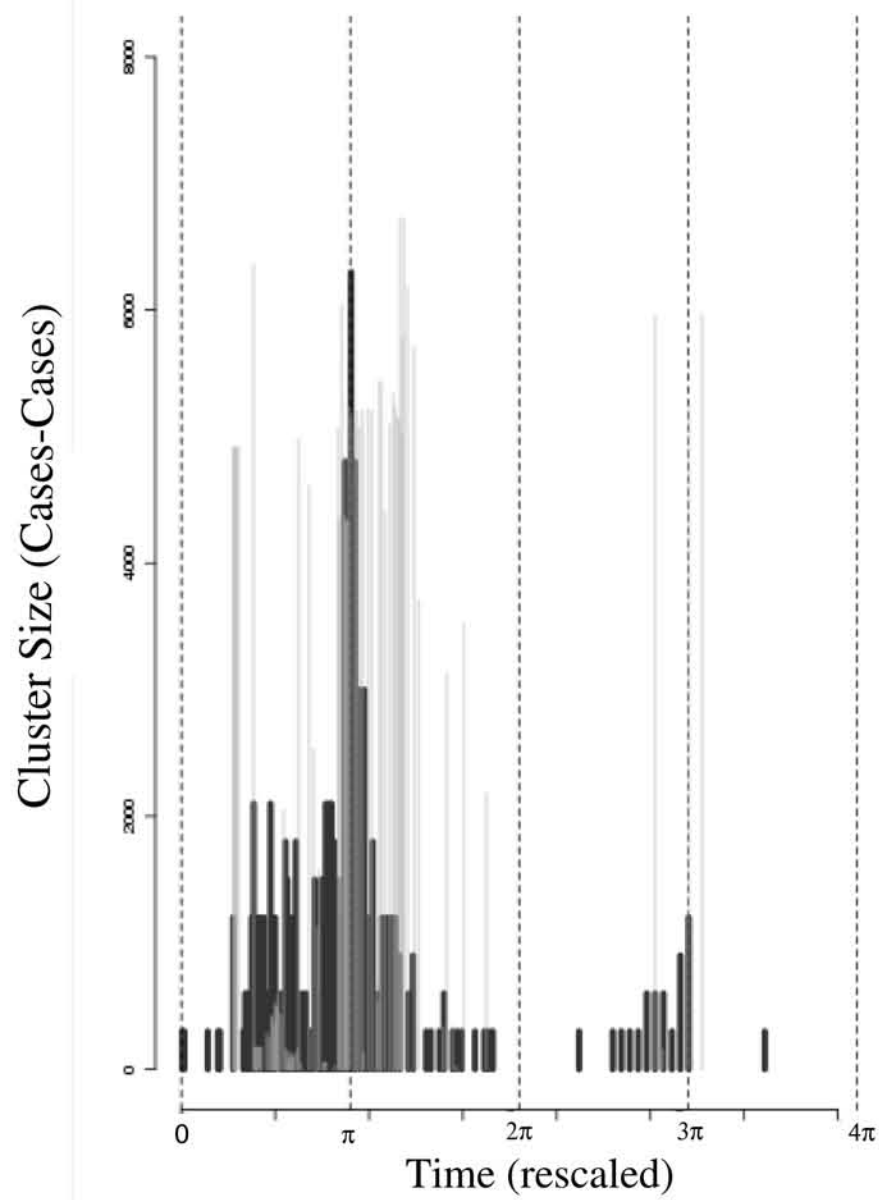

Classical Inaba

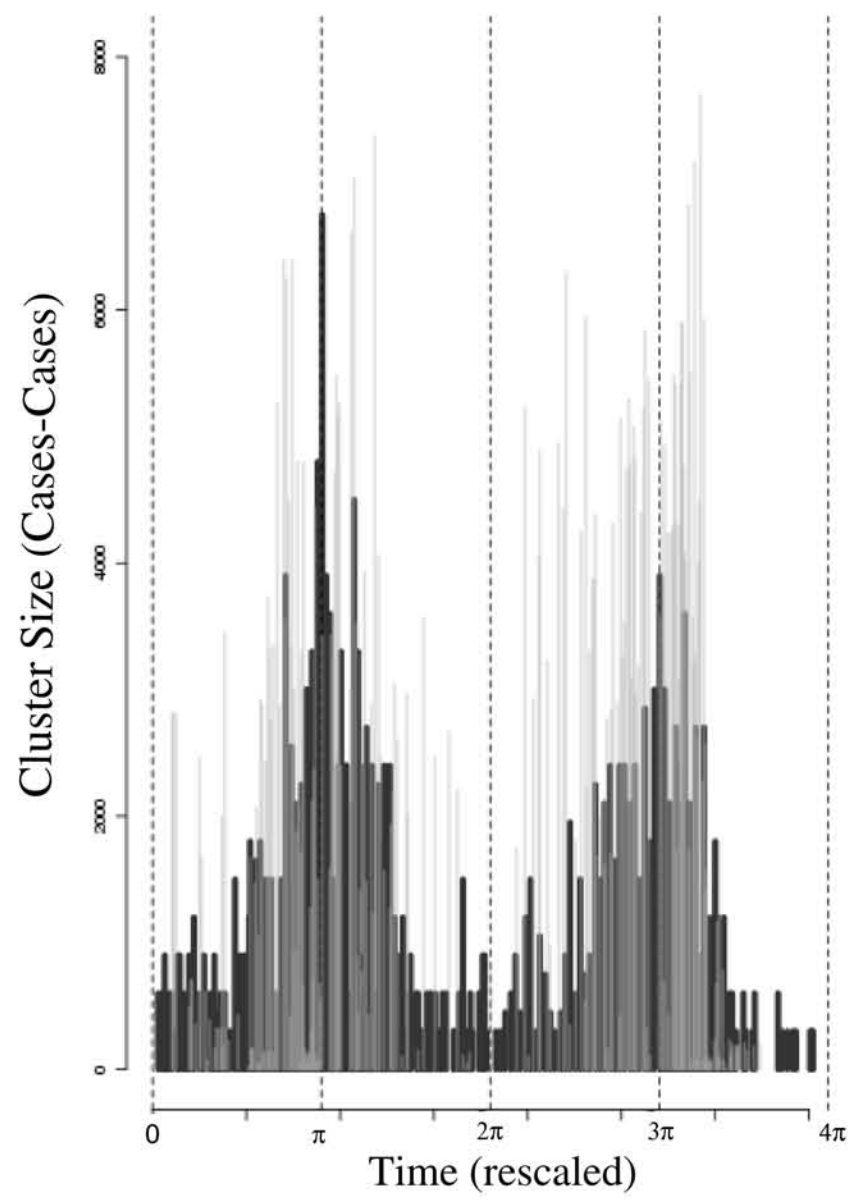

El Tor Inaba

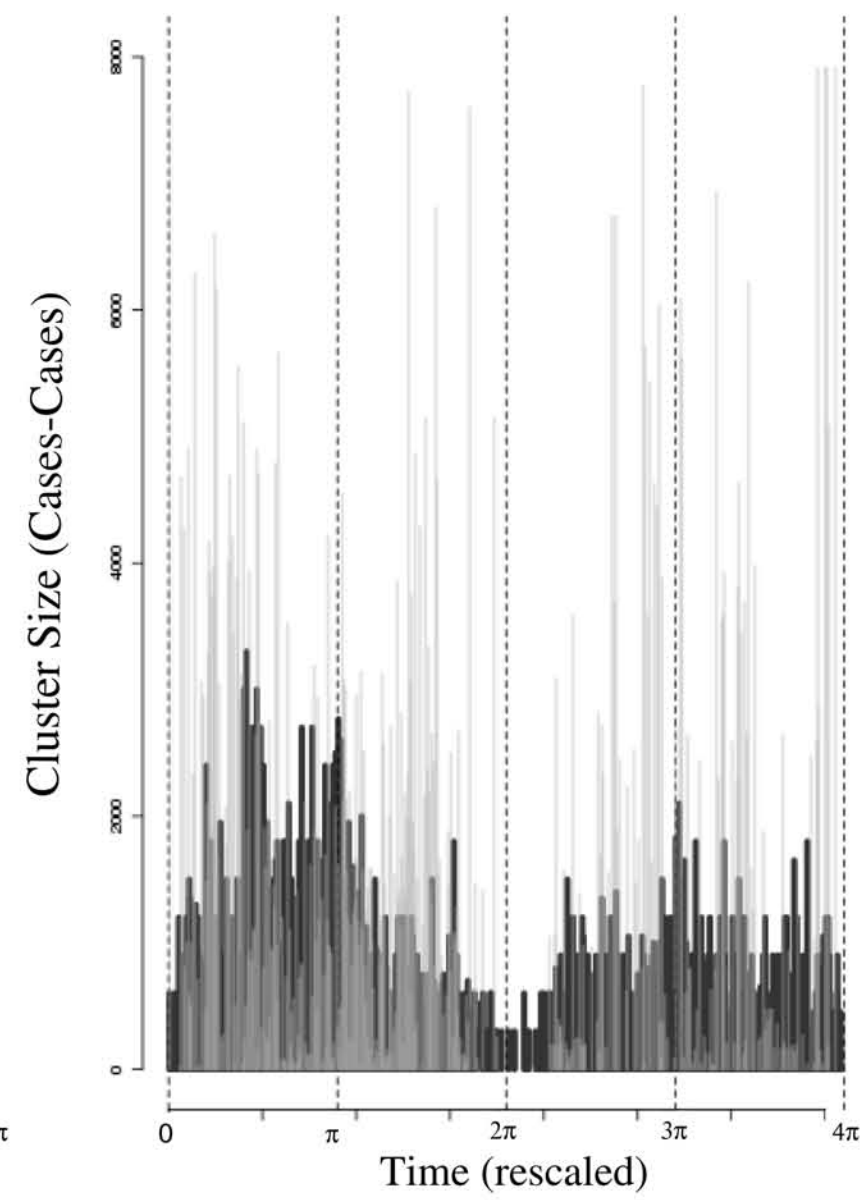

Classical Ogawa

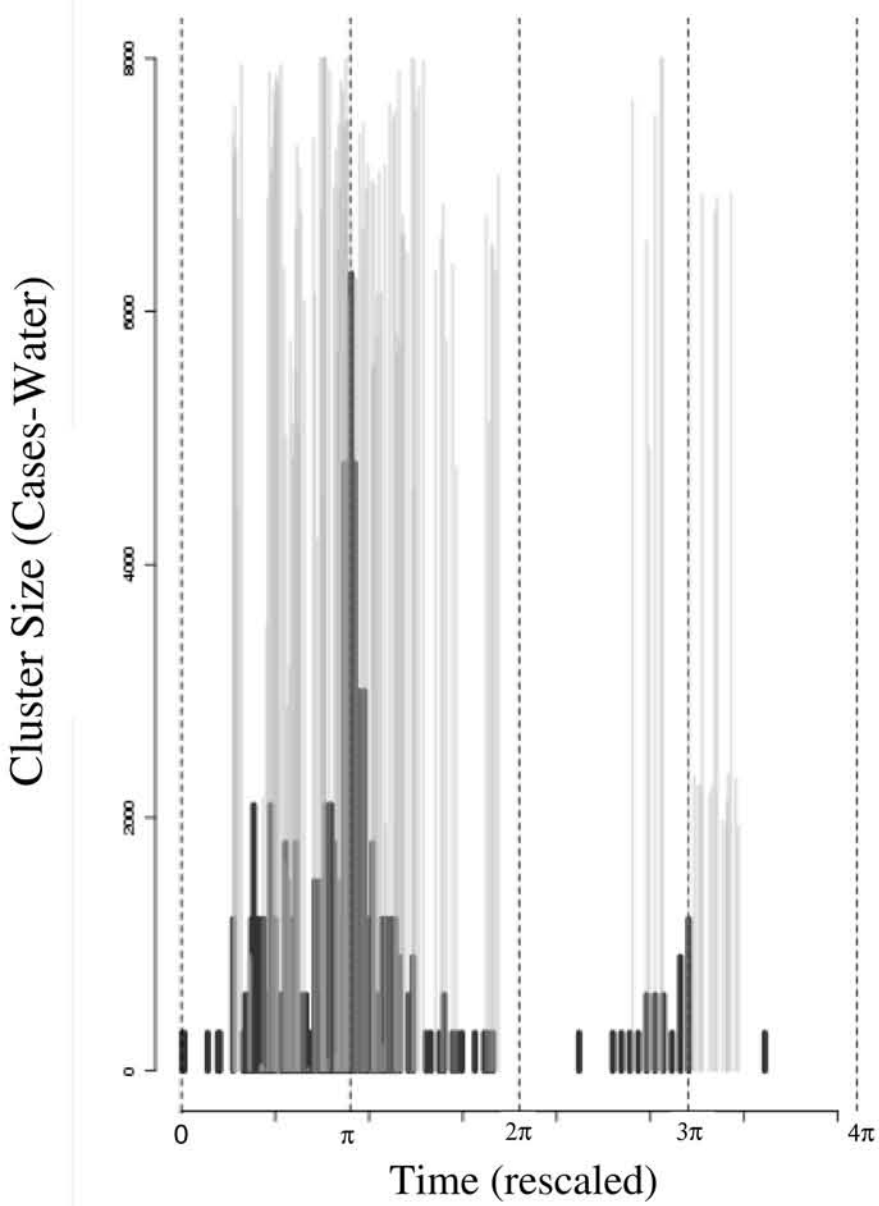

Classical Inaba

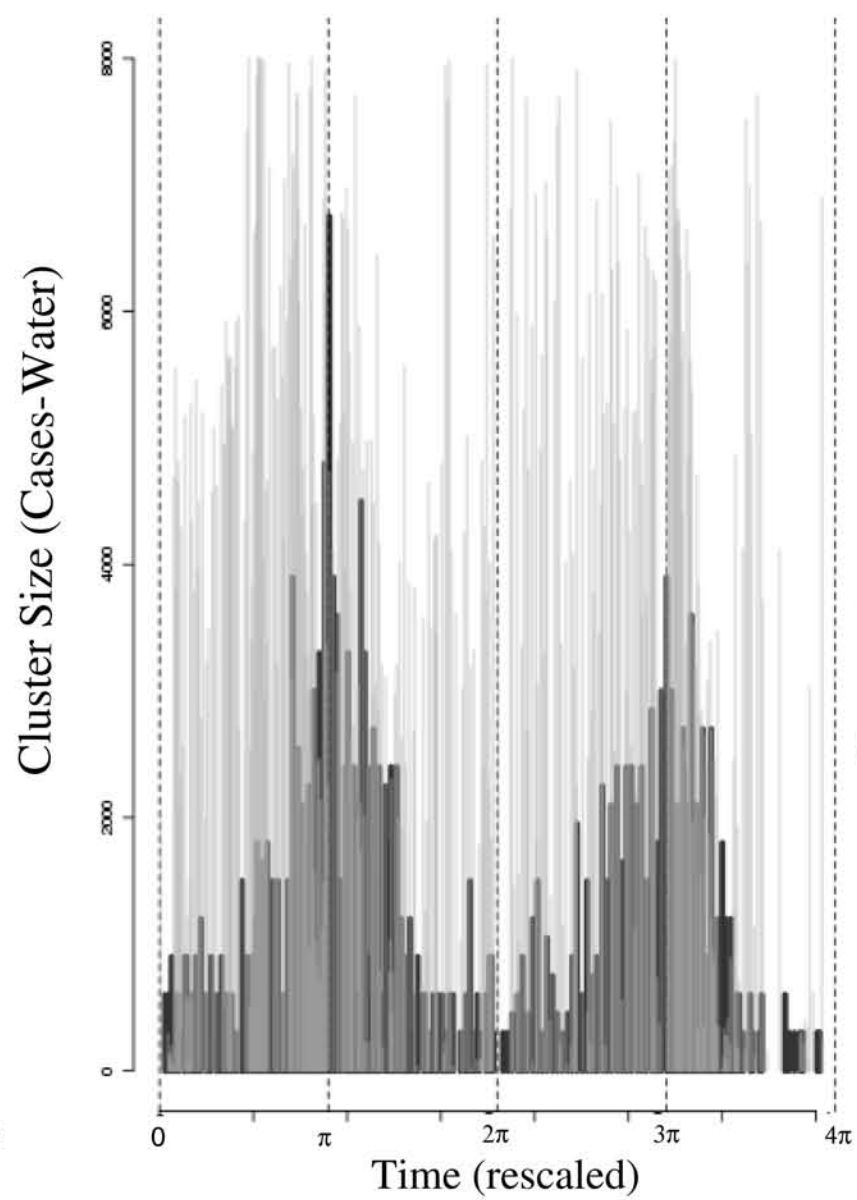

El Tor Inaba

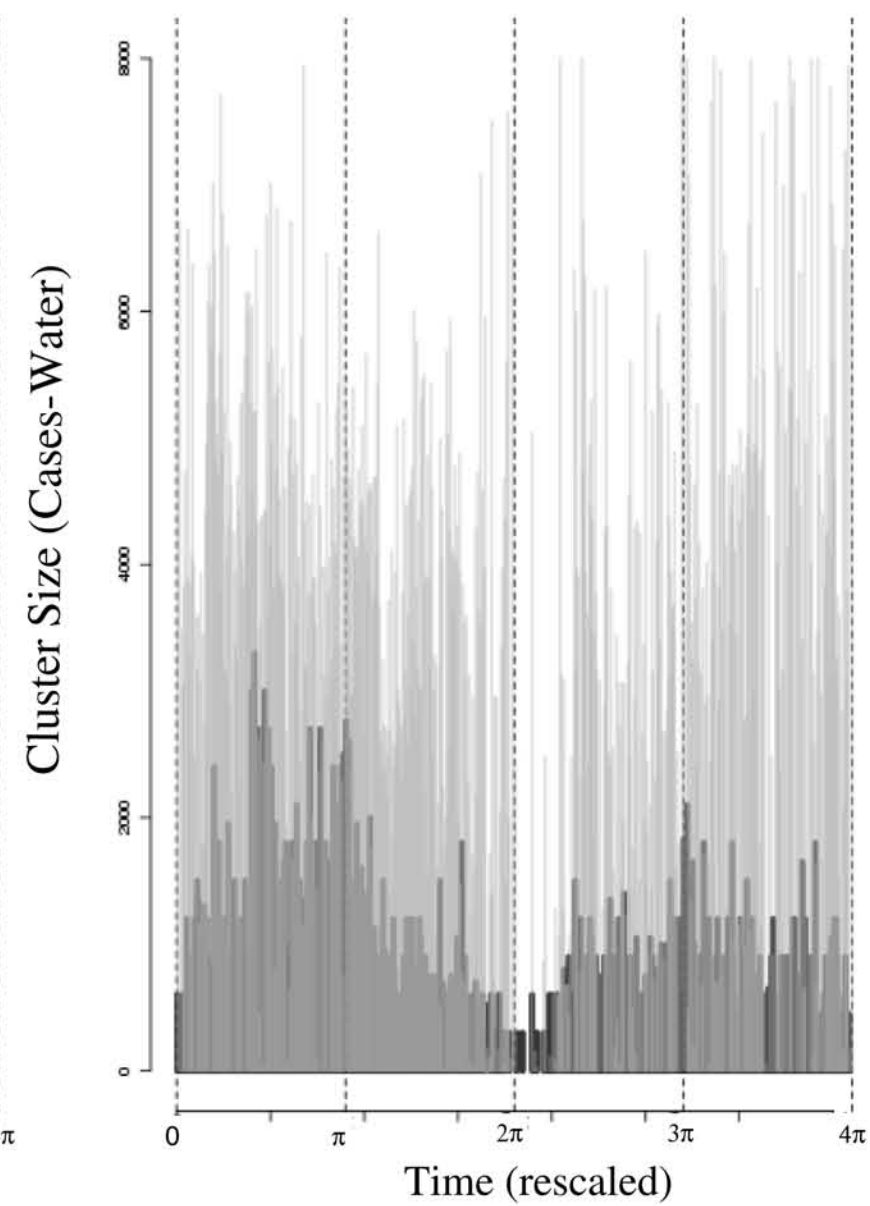

Supplement: MOESM12 [file 9442434]
